# Supplementary material for: Intracoronary Bone Marrow–Derived Progenitor Cells in Acute Myocardial Infarction
Source: Atypon-hosted journal article supplement (doi:10.1056/nejmoa060186), 2006-09-21
Supplement: nejm_schachinger_1210sa1.pdf [file nejm_schachinger_1210sa1.pdf]

## Supplementary Appendix

This appendix has been provided by the authors to give readers additional information about their work.

Supplement to: Schächinger V, Erbs S, Elsässer A, et al. Intracoronary bone marrow-derived progenitor cells in acute myocardial infarction. *N Engl J Med* 2006;355:1210-21.

## Web-only Table: Cell characteristics

|                                                                          | Placebo #<br>(n = 103) | BMC<br>(n = 101)   |      |
|--------------------------------------------------------------------------|------------------------|--------------------|------|
| <b>Number and viability</b>                                              |                        |                    |      |
| Number of mononuclear cells (x 10 <sup>6</sup> )                         | 273 ± 241 (210)        | 236 ± 174 (198)    | 0.70 |
| Viability of cells (%)                                                   | 99 ± 0.7 (99)          | 98 ± 1.2 (99)      | 0.85 |
| <b>Recovery*</b>                                                         |                        |                    |      |
| White blood cells (%)                                                    | 27 ± 29 (22)           | 22 ± 8 (21)        | 0.36 |
| CD34 <sup>+</sup> / CD45 <sup>+</sup> (%)                                | 46 ± 28 (41)           | 48 ± 24 (50)       | 0.55 |
| CD34 <sup>+</sup> / CD133 <sup>+</sup> / CD45 <sup>+</sup> (%)           | 47 ± 27 (44)           | 49 ± 23 (50)       | 0.46 |
| <b>Surface markers (FACS analyses)</b>                                   |                        |                    |      |
| CD34 <sup>+</sup> / CD45 <sup>+</sup> (%)                                | 1.6 ± 0.7 (1.4)        | 1.5 ± 0.7 (1.4)    | 0.30 |
| absolute cell number x 10 <sup>6</sup>                                   | 4.4 ± 4.0 (3.3)        | 3.6 ± 3.6 (2.5)    | 0.30 |
| CD133 <sup>+</sup> / CD45 <sup>+</sup> (%)                               | 1.2 ± 0.5 (1.1)        | 1.1 ± 0.54 (3.1)   | 0.32 |
| absolute cell number x 10 <sup>6</sup>                                   | 3.3 ± 3.0 (2.2)        | 2.8 ± 2.8 (1.9)    | 0.39 |
| CD34 <sup>+</sup> / CD133 <sup>+</sup> / CD45 <sup>+</sup> (%)           | 1.03 ± 0.46(0.99)      | 0.99 ± 0.47 (0.93) | 0.49 |
| absolute cell number x 10 <sup>6</sup>                                   | 2.9 ± 2.7 (2.1)        | 2.5 ± 2.5 (1.8)    | 0.51 |
| KDR <sup>+</sup> / CD45 <sup>+</sup> (%)                                 | 0.12 ± 0.30 (0.06)     | 0.09 ± 0.10 (0.06) | 0.69 |
| absolute cell number x 10 <sup>6</sup>                                   | 0.35 ± 1.13 (0.11)     | 0.19 ± 0.23 (0.09) | 0.96 |
| <b>Colony forming unit capacity</b>                                      |                        |                    |      |
| - hematopoietic colonies (number/10 <sup>6</sup> )                       | 32 ± 18 (29)           | 30 ± 14 (27)       | 0.49 |
| - mesenchymal colonies (number/10 <sup>6</sup> )                         | 22 ± 21 (17)           | 19 ± 16 (16)       | 0.88 |
| <b>Migratory capacity</b>                                                |                        |                    |      |
| - Basal (number/10 <sup>6</sup> )                                        | 90 ± 57 (82)           | 101 ± 74 (81)      | 0.54 |
| - SDF -1 (number/10 <sup>6</sup> )                                       | 162 ± 87 (161)         | 171 ± 90 (163)     | 0.60 |
| <b>Hindlimb ischemia model</b>                                           |                        |                    |      |
|                                                                          | n = 21                 | n = 21             |      |
| - Laser-Doppler derived blood flow recovery (ratio ischemic/normal limb) | 0.59 ± 0.13 (0.57)     | 0.58 ± 0.12 (0.57) | 0.81 |

# The placebo group received an intracoronary infusion without containing cells; nevertheless, cell processing and determination of cell characteristics was performed also in placebo group patients.

\* Recovery = number after cell processing procedure in relation to unprocessed bone marrow aspirate, expressed in percent.

all data are expressed as mean ± SD (median)
